# Supplementary material for: Monounsaturated Fat–Rich Diet Prevents Central Body Fat Distribution and Decreases Postprandial Adiponectin Expression Induced by a Carbohydrate-Rich Diet in Insulin-Resistant Subjects
Source: Oxford University Press journal article supplement (doi:10.2337/dc06-2220), 2007-06-27
Supplement: dc062220-sup-2220_online_appendix.doc [file dc062220-sup-2220_online_appendix.doc]

**Table 1 ** Baseline characteristics of the insulin-resistant subjects.

| Gender | 4 Male 7 Female |
| --- | --- |
| Age in years | 62.3  9.4 |
| Body mass index (kg/m2) | 32.6  7.8 |
| Waist circumference, (cm) | 106.2 (Male) ; 112.8 (Female) |
| Glycosilated hemoglobin % | 6.0 ± 0.5 |
| Serum glucose, mmol/L. |  |
| Fasting* | 5.47 ± 0.5 |
| 2 h after oral glucose load | 8.75 ± 1.6 |
| Serum insulin, pmol/L. |  |
| Fasting* | 87.5 ± 26.6 |
| 2 h after oral glucose load | 959 ± 486 |
| Matsuda Index (ISIm)** | 2.9 ± 0.9 |
| Treatment of hypertension | 3 Yes 8 No |
| Blood pressure (mm Hg) |  |
| Systolic | 136  8.6 |
| Diastolic | 87  5.8 |
| Mean | 103  3.7 |

Data are Means  SD.

*Mean of basal determinations obtained on two separate occasions. To convert glucose to mg, divide mmol by 0.0555; to convert insulin to IU/ml, divide pmol by 6.945 pmol/L. ** ISIm= 104 / (G0x I0) x (MPGxMSI). Values ranged from 1.49 to 3.96, with higher values indicating greater activity.  Mean Blood Pressure = (Systolic – Diastolic)/3 + Diastolic.

**TABLE 2  Indirect calorimetry results after th**e three dietary periods.

|  | **High-SAT** | **High-MUFA** | **High-CHO** | ***P*** |
| --- | --- | --- | --- | --- |
| **Energy expenditure (kJ/min)** | 5.49±3.90 | 5.23±0.37 | 5.02±0.36 | 0.30 |
| **Carbohydrate oxidation (kJ/min)** | 2.51±0.31 | 1.87±0.33 | 1.97±0.37 | 0.49 |
| **Fat oxidation (kJ/min)** | 1.52±0.13 | 1.80±0.35 | 1.38±0.29 | 0.04 |
| **Protein oxidation (kJ/min)** | 1.46±0.12 | 1.55±0.12 | 1.65±0.17 | **0.27** |
| **Respiratory quotient** | 0.91±0.02 | 0.89±0.02 | 0.91±0.02 | 0.28 |
| **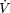O2 (mL· kg-1 · d-1)** | 3.30±0.22 | 3.28±0.21 | 3.15±0.14 | 0.18 |
| **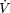CO2 (mL· kg-1 · d-1)** | 3.06±0.20 | 2.91±0.19 | 2.84±0.18 | 0.16 |
| **Urinary N (mg · kg-1 · d-1)** | 123.7±11 | 132±11 | 144±17 | 0.24 |

Data are means  SEM. *P value* is analysis of variance for repeated variables. Saturated fat (SAT), monounsaturated fat (MUFA) and carbohydrate-rich (CHO) diets. Urine collections were taken at night over a period of 12 hours.

**Table 3. Fatty acid composition in fasting plasma phospholipids after the three diet periods.**

|  | **High-SAT** | **High-MUFA** | **High-CHO** | *p* |
| --- | --- | --- | --- | --- |
| Palmitic acid, (16:0) | 23.30±0.47 | 21.40±0.46 | 23.46±0.51 | <0.01 |
| Stearic acid, (18:0) | 10.00±0.27 | 9.23±0.28 | 10.07±0.37 | <0.05 |
| **Total SAT fatty acids** | **36.50±0.44** | **33.51±0.45** | **35.70±0.35** | **<0.01** |
| Oleic acid, (18:1, n-9) | 20.37±1.22 | 24.91±0.67 | 21.83±0.59 | <0.01 |
| Erucic acid, (22:1) | 6.17±0.44 | 5.53±0.39 | 5.73±0.43 | 0.2 |
| **Total MUFA fatty acids** | **29.27±1.82** | **33.20±1.19** | **31.93 ±1.24** | **<0.05** |
| Linoleic acid, (18:2, ώ-6) | 23.41±1.22 | 22,58±0.62 | 22.04±0.81 | 0,6 |
| Arachidonic acid, (20:4, ώ-6) | 6.28±0.02 | 6,28±0.02 | 6.28±0.02 | 0,6 |
| **Total PUFA fatty acids** | **33.28±1.67** | **32.06±0.9** | **31.81±1.16** | **0.6** |

Total saturated (SAT) fatty acids also included Myrystic Acid, Margaric acid, Arachidic acid, Behenic acid and Lignoceric acid. Total monounsaturated (MUFA) fatty acids also included Palmitoleic acids and Vaccenic acid. Total polyunsaturated (PUFA) fatty acids also included α-linolenic acid, Stearidonic acid, Eicosapentaenoic acid, Docosapentaenoic acid and Docosahexaenoic acid. Data are means  SEM of percentage of total fatty acids. *P value*, analysis of variance of repeated variables.

**TABLE 4. Composition and body fat distribution after three dietary interventions in insulin-resistant subjects.**

|  | **Baseline** | **High-SAT** | **High-MUFA** | **High-CHO** | ***p*** |
| --- | --- | --- | --- | --- | --- |
| EE, (kJ/min) | 5,36±0,40 | 5,49±3,90 | 5,23±0,37 | 5,02±0,36 | 0,30 |
| **Antropometry** |  |  |  |  |  |
| Weight, kg | 84.4±5.7 | 83.2±5.7 | 83.6±5.8 | 81.8±6.03 | 0.3 |
| Total body fat, kg | 36.8±4.1 | 35.0±4.0 | 35.6±4.0 | 34.9±4.3 | 0.1 |
| Lean body mass, kg | 47.5±2.5 | 48.1±2.5 | 48.9±2.6 | 46.8±2.1 | 0.2 |
| Waist to hip ratio | 0.99±0.01 | 0.99±0.01 | 0.98±0.01 | 0.98±0.01 | 0.9 |
| **DEXA analysis** |  |  |  |  |  |
| Total body trunk, g | - | 37101±2026 | 38154±1911 | 39134±2104 | 0.3 |
| Fatty body trunk, g | - | 14313±1362 | 14842±1437 | 16459±1653 | <0.05 |
| Total body limb, g | - | 36420±3886 | 36239±3862 | 32887±3825 | 0.7 |
| - Fat in arm, g | - | 7097±1528 | 7652±1339 | 7225±1830 | 0.4 |
| - Fat in leg, g | - | 8517±1588 | 8036±1398 | 7358±1253 | <0.05 |
| Fat trunk:fat leg ratio | - | 1.9±0.3 | 2.1±0.2 | 2.50±0.2 | <0.05 |

Data are Mean  SE. *P value* is analysis of variance for repeated variables. Energy expenditure (EE). Saturated fat (SAT), monounsaturated fat (MUFA) and carbohydrates rich (CHO) diets. DEXA is dual energy x-ray absorptiometry.

**TABLE 5  Hormonal, adipokines and metabolic parameters after the three dietary periods in insulin-resistant subjects**.

|  | **High-SAT** | **High-MUFA** | **High-CHO** | ***p*** |
| --- | --- | --- | --- | --- |
| **Glucose, mmol/L** |  |  |  |  |
| Fasting | 5.5±0.2 | 5.0±0.1 | 5.0±0.1 | < 0.05 |
| AUC, mmol · 180 min/L | 5.8±1.2 | 7.8±1.3 | 11.9±2.7 | < 0.05 |
| **Insulin, pmol/L** |  |  |  |  |
| Fasting | 64.1±9.6 | 60.7±12.4 | 75.2±12.3 | 0.3 |
| AUC, pmol · 180 min/L | 142.4±28.9 | 113.8±29.6 | 259.3±74.2 | < 0.05 |
| **SI** [x10-4 min-1/ (µU/mL)] | 3.3±0.5 | 3.9±0.6 | 3.5±0.4 | < 0.05 |
| **AIR** (µU/mL) | 264.7±82.7 | 335.6±85 | 347.4±75.5 | < 0.05 |
| **Glucagon, µg /L** |  |  |  |  |
| Fasting | 322±75 | 436±110 | 495±102 | < 0.05 |
| AUC, ng · 180 min/mL | 125±162 | 466±210 | -55±67 | 0.07 |
| **Adiponectin, mg/L** |  |  |  |  |
| Fasting | 8.6±1.7 | 9.4±1.5 | 12±1.7 | p=0.08 |
| Postprandial (180’) | 11.1±2.3 | 11.2±1.9 | 10.7±2.4 | p=0.8 |
| **Resistin, µg /L** |  |  |  |  |
| Fasting | 10.3±1.1 | 10.5±1.3 | 11.5±1.8 | p=0.8 |
| Postprandial (180’) | 10.3±1.0 | 10.4±1.2 | 10.4±0.9 | p=0.8 |
| **Leptin, µg /L** |  |  |  |  |
| Fasting | 31.6±9.4 | 23.7±7.4 | 32.1±10.3 | P<0.05 |
| Postprandial (180’) | 20.3±4.4 | 21.1±7.0 | 24.7±7.4 | P=0.4 |

Data are means  SEM. *P value* is analysis of variance for repeated variables. Saturated fat-rich (SAT), monounsaturated fat-rich (MUFA) and high-carbohydrate (CHO) diets. NEFA is nonesterified fatty acids.
